# Supplementary material for: Tet methylcytosine dioxygenase 2 inhibits atherosclerosis via upregulation of autophagy in ApoE−/− mice
Source: PubMed Central journal article supplement (PMC5363520; doi:10.18632/oncotarget.13121), 2016-11-04
Supplement: oncotarget-07-76423-s001.pdf [file oncotarget-07-76423-s001.pdf]

# Tet methylcytosine dioxygenase 2 inhibits atherosclerosis *via* upregulation of autophagy in ApoE<sup>-/-</sup> mice

## Supplementary Material

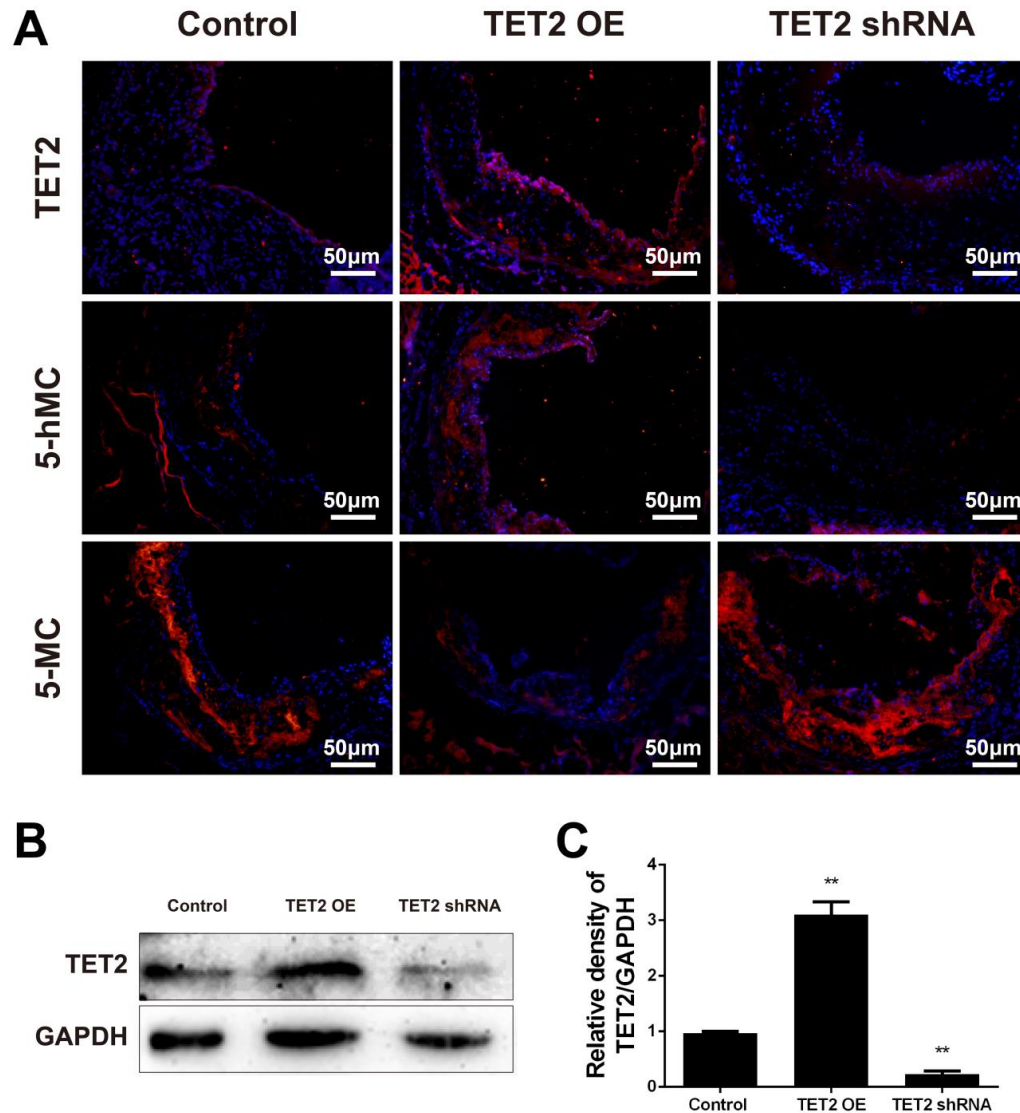

**Supplementary Fig. 1. Expression of TET2, 5hmC, and 5mC in the atherosclerotic plaques in the control, TET2 OE, and TET2 shRNA-treated ApoE<sup>-/-</sup> mice.** (A) Representative micrographs of immunofluorescence staining of TET2, 5hmC, and 5mC in atherosclerotic plaques were derived from the control, TET2 OE, and TET2 shRNA ApoE<sup>-/-</sup> mice fed with high-fat diet for 12 weeks. Scale bar is 50  $\mu$ M. (B–C) TET2 levels were determined in aortic arch using Western blot. Values are mean  $\pm$  SD. ( $n=3$  each). \*\* $P<0.01$  versus control group. TET2 OE:TET2 overexpression.

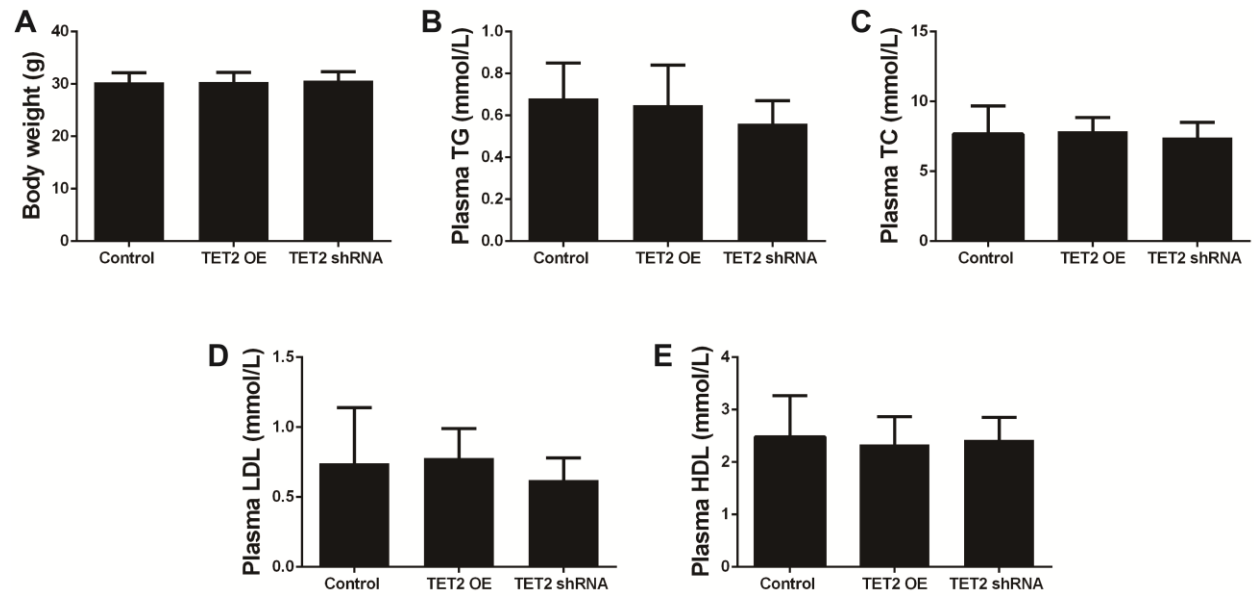

**Supplementary Fig. 2. TET2 had no effect on body weight and plasma lipid profile in high-fat-fed *ApoE*<sup>-/-</sup> mice.** Body weight and plasma lipid profile in *ApoE*<sup>-/-</sup> mice on a high-fat diet for 12 weeks. (A) Body weight ; (B) TG; (C) TC; (D) LDL; (E) HDL. Values are mean ± SD. (n=20 each).
